# Supplementary material for: Методические вопросы обучения студентов исследованию сходств и различий в интерпретации универсальных культурных концептов
Source: MDPI journal article supplement (doi:10.3390/s23041879), 2012-01-01
Supplement: s1 [file s1]

Table S1. Effect sizes by the comparison of the PA variables in the four quadrants

| Variable                                           | Gruppenvergleich                    | n   | Z      | p     | ES    | Interpretation |
|----------------------------------------------------|-------------------------------------|-----|--------|-------|-------|----------------|
| p95 cadence (in steps per min).                    | Can do don't do - Can't do do do    | 116 | 0.63   | 0.53  | 0.06  | low            |
|                                                    | Can do do do - Can do don't do      | 126 | 0.50   | 0.61  | 0.04  | low            |
|                                                    | Can do don't do - Can't do don't do | 142 | -2.43  | 0.02  | 0.20  | low            |
|                                                    | Can do do do - Can't do do do       | 152 | 1.31   | 0.19  | 0.11  | low            |
|                                                    | Can't do don't do - Can't do do do  | 168 | -2.04  | 0.04  | 0.16  | low            |
|                                                    | Can do do do - Can't do don't do    | 178 | 3.54   | <0.01 | 0.27  | low            |
| mean cadence (in steps per min)                    | Can do don't do - Can't do do do    | 116 | -4.36  | <0.01 | 0.40  | moderate       |
|                                                    | Can do do do - Can do don't do      | 126 | 4.44   | <0.01 | 0.40  | moderate       |
|                                                    | Can do don't do - Can't do don't do | 142 | -1.01  | 0.31  | 0.09  | low            |
|                                                    | Can do do do - Can't do do do       | 152 | -0.03  | 0.98  | <0.01 | low            |
|                                                    | Can't do don't do - Can't do do do  | 168 | -6.49  | <0.01 | 0.50  | large          |
|                                                    | Can do do do - Can't do don't do    | 178 | 6.71   | <0.01 | 0.50  | large          |
| walking duration lower 3 METs (in min).            | Can do don't do - Can't do do do    | 116 | -7.08  | <0.01 | 0.66  | large          |
|                                                    | Can do do do - Can do don't do      | 126 | 6.42   | <0.01 | 0.57  | large          |
|                                                    | Can do don't do - Can't do don't do | 142 | 0.65   | 0.52  | 0.05  | low            |
|                                                    | Can do do do - Can't do do do       | 152 | -0.95  | 0.34  | 0.08  | low            |
|                                                    | Can't do don't do - Can't do do do  | 168 | -7.89  | <0.01 | 0.61  | large          |
|                                                    | Can do do do - Can't do don't do    | 178 | 7.16   | <0.01 | 0.54  | large          |
| walking duration greater or equal 3 METs (in min). | Can do don't do - Can't do do do    | 116 | -6.83  | <0.01 | 0.63  | large          |
|                                                    | Can do do do - Can do don't do      | 126 | 7.77   | <0.01 | 0.69  | large          |
|                                                    | Can do don't do - Can't do don't do | 142 | -1.82  | 0.07  | 0.15  | low            |
|                                                    | Can do do do - Can't do do do       | 152 | 0.88   | <0.01 | 0.07  | low            |
|                                                    | Can't do don't do - Can't do do do  | 168 | -10.43 | <0.01 | 0.80  | large          |
|                                                    | Can do do do - Can't do don't do    | 178 | 11.77  | <0.01 | 0.88  | large          |

|                                                             |                                        |     |       |       |      |          |
|-------------------------------------------------------------|----------------------------------------|-----|-------|-------|------|----------|
| Percentage walking duration greater or equal 3 METs (in %). | Can do don't do -<br>Can't do do do    | 116 | 1.76  | <0.01 | 0.16 | low      |
|                                                             | Can do do do -<br>Can do don't do      | 126 | -3.63 | <0.01 | 0.32 | moderate |
|                                                             | Can do don't do -<br>Can't do don't do | 142 | 2.86  | <0.01 | 0.24 | low      |
|                                                             | Can do do do -<br>Can't do do do       | 152 | -2.09 | <0.01 | 0.17 | low      |
|                                                             | Can't do don't do -<br>Can't do do do  | 168 | 5.45  | <0.01 | 0.42 | moderate |
|                                                             | Can do do do -<br>Can't do don't do    | 178 | -7.91 | <0.01 | 0.59 | large    |
| maximum continuous number of steps                          | Can do don't do -<br>Can't do do do    | 116 | -3.45 | <0.01 | 0.32 | moderate |
|                                                             | Can do do do -<br>Can do don't do      | 126 | 5.01  | <0.01 | 0.45 | moderate |
|                                                             | Can do don't do -<br>Can't do don't do | 142 | -1.98 | 0.05  | 0.17 | low      |
|                                                             | Can do do do -<br>Can't do do do       | 152 | 1.68  | 0.09  | 0.14 | low      |
|                                                             | Can't do don't do -<br>Can't do do do  | 168 | -6.50 | <0.01 | 0.50 | large    |
|                                                             | Can do do do -<br>Can't do don't do    | 178 | 8.56  | <0.01 | 0.64 | large    |
| maximum walking interval length (in sec).                   | Can do don't do -<br>Can't do do do    | 116 | -3.64 | <0.01 | 0.34 | moderate |
|                                                             | Can do do do -<br>Can do don't do      | 126 | 4.89  | <0.01 | 0.44 | moderate |
|                                                             | Can do don't do -<br>Can't do don't do | 142 | -1.13 | <0.01 | 0.09 | low      |
|                                                             | Can do do do -<br>Can't do do do       | 152 | 1.32  | 0.19  | 0.11 | low      |
|                                                             | Can't do don't do -<br>Can't do do do  | 168 | -5.74 | <0.01 | 0.44 | moderate |
|                                                             | Can do do do -<br>Can't do don't do    | 178 | 7.39  | <0.01 | 0.55 | large    |
| average walking interval length (in sec).                   | Can do don't do -<br>Can't do do do    | 116 | -3.27 | <0.01 | 0.30 | moderate |
|                                                             | Can do do do -<br>Can do don't do      | 126 | 4.57  | <0.01 | 0.41 | moderate |
|                                                             | Can do don't do -<br>Can't do don't do | 142 | -1.35 | 0.18  | 0.11 | low      |
|                                                             | Can do do do -<br>Can't do do do       | 152 | 1.39  | 0.16  | 0.11 | low      |
|                                                             | Can't do don't do -<br>Can't do do do  | 168 | -5.54 | <0.01 | 0.43 | moderate |
|                                                             | Can do do do -<br>Can't do don't do    | 178 | 7.25  | <0.01 | 0.54 | large    |
| number of walking intervals.                                | Can do don't do -<br>Can't do do do    | 116 | -7.47 | <0.01 | 0.69 | large    |
|                                                             | Can do do do -<br>Can do don't do      | 126 | 7.19  | <0.01 | 0.64 | large    |

|                                                                     |                                        |     |       |       |      |          |
|---------------------------------------------------------------------|----------------------------------------|-----|-------|-------|------|----------|
|                                                                     | Can do don't do -<br>Can't do don't do | 142 | -0.18 | 0.86  | 0.02 | low      |
|                                                                     | Can do do do -<br>Can't do do do       | 152 | -0.53 | 0.60  | 0.04 | low      |
|                                                                     | Can't do don't do -<br>Can't do do do  | 168 | -9.32 | <0.01 | 0.72 | large    |
|                                                                     | Can do do do -<br>Can't do don't do    | 178 | 9.10  | <0.01 | 0.68 | large    |
| Percentage<br>number of<br>walking<br>intervals<br>length<br><10s . | Can do don't do -<br>Can't do do do    | 116 | 6.13  | <0.01 | 0.57 | large    |
|                                                                     | Can do do do -<br>Can do don't do      | 126 | -5.70 | <0.01 | 0.51 | large    |
|                                                                     | Can do don't do -<br>Can't do don't do | 142 | -1.45 | 0.15  | 0.12 | low      |
|                                                                     | Can do do do -<br>Can't do do do       | 152 | 0.66  | 0.51  | 0.05 | low      |
|                                                                     | Can't do don't do -<br>Can't do do do  | 168 | 5.80  | <0.01 | 0.45 | moderate |
|                                                                     | Can do do do -<br>Can't do don't do    | 178 | -5.31 | <0.01 | 0.40 | moderate |
| Percentage<br>number of<br>walking<br>intervals<br>length<br><20s . | Can do don't do -<br>Can't do do do    | 116 | 3.95  | <0.01 | 0.37 | moderate |
|                                                                     | Can do do do -<br>Can do don't do      | 126 | -4.31 | <0.01 | 0.38 | moderate |
|                                                                     | Can do don't do -<br>Can't do don't do | 142 | 0.62  | 0.54  | 0.05 | low      |
|                                                                     | Can do do do -<br>Can't do do do       | 152 | -0.29 | 0.77  | 0.02 | low      |
|                                                                     | Can't do do do -<br>Can't do don't do  | 168 | 5.53  | <0.01 | 0.43 | moderate |
|                                                                     | Can do do do -<br>Can't do don't do    | 178 | -6.06 | <0.01 | 0.45 | moderate |
| Percentage<br>number of<br>walking<br>intervals<br>length<br><60s . | Can do don't do -<br>Can't do do do    | 116 | -0.22 | 0.82  | 0.02 | low      |
|                                                                     | Can do do do -<br>Can do don't do      | 126 | -0.14 | 0.89  | 0.01 | low      |
|                                                                     | Can do don't do -<br>Can't do don't do | 142 | 2.16  | 0.03  | 0.18 | low      |
|                                                                     | Can do do do -<br>Can't do do do       | 152 | -0.42 | 0.67  | 0.03 | low      |
|                                                                     | Can't do do do -<br>Can't do don't do  | 168 | 2.22  | 0.03  | 0.17 | low      |
|                                                                     | Can do do do -<br>Can't do don't do    | 178 | -2.76 | 0.01  | 0.21 | low      |

n= number of participants; z= z-value; p= p-value ES= effect size calculated by z/square root(n); \*ES: 0.1-0.3=low. 0.3 - 0.5=moderate. greater than 0.5=high
